# Supplementary material
Source: PubMed Central journal article supplement (PMC3057187)
Supplement: NIHMS261388-supplement-01.pdf [file NIHMS261388-supplement-01.pdf]

**Table S1. Electrophysiology of Cultured *CFTR*<sup>+/+</sup> and *CFTR*<sup>-/-</sup> Nasal and Tracheal/Bronchial Epithelia from the Same Culture Sets Used in Figures 3A–3C**

| Animal | Tissues  | N  | Vt (mV)               | Isc ( A/cm <sup>2</sup> ) | Gt (mS/cm <sup>2</sup> ) |
|--------|----------|----|-----------------------|---------------------------|--------------------------|
| Non-CF | Nasal    | 7  | 19.4±1.7              | 59.6±2.7                  | 8.27±0.57                |
| CF     | Nasal    | 7  | 38.8±3.2*             | 102.5±15.4*               | 4.11±0.48*               |
| Non-CF | Tracheal | 12 | 31.3±2.7 <sup>#</sup> | 44.4±5.6 <sup>#</sup>     | 1.51±0.13 <sup>#</sup>   |
| CF     | Tracheal | 7  | 36.0±3.8              | 42.0±8.2 <sup>#</sup>     | 1.20±0.20 <sup>#</sup>   |

Data are electrophysiological measurements from epithelia that were paired (from the same animals) with those used in Fig. 3A-C. Data are means ± SEM. N; number of experiment. \*, values from CF epithelia were significantly different from values from non-CF epithelia ( $p < 0.05$ ). #, values from tracheal epithelia were significantly different from values from nasal epithelia of the same genotype ( $p < 0.05$ ).
