# Supplementary material
Source: PubMed Central journal article supplement (PMC3057187)
Supplement: NIHMS261388-supplement-02.pdf [file NIHMS261388-supplement-02.pdf]

**Table S2. Primer Sequences for Real-Time PCR**

| Target gene                 |         | Primer sequence (5' → 3') | Product size (bp) |
|-----------------------------|---------|---------------------------|-------------------|
| GAPDH                       | Forward | ACCAGGGCTGCTTTTAACTCTG    | 130               |
|                             | Reverse | CCTTGACTGTGCCGTGGAAC      |                   |
| β-Actin                     | Forward | CTGCGGCATCCACGAAACT       | 141               |
|                             | Reverse | GTGATCTCCTTCTGCATCCTGTG   |                   |
| CFTR                        | Forward | CACTACGCTGGTTCCAAATGC     | 109               |
|                             | Reverse | ATCCCAACTGTTTCCTTCTCCTTC  |                   |
| NKCC                        | Forward | CAGTGGCATCCCGAACAACA      | 109               |
|                             | Reverse | CCTCAGTCAGCTATAACCGAAAGG  |                   |
| K <sub>V</sub> LQT1 channel | Forward | ACAAGGACAACGGGCTGAG       | 106               |
|                             | Reverse | CCATCCACCGAGAAGTGGTCA     |                   |
| KCa3.1 channel              | Forward | CCACGCACAAAGCACCTCAAGT    | 103               |
|                             | Reverse | GCCTCCTCCTTCAGCCAGTGTC    |                   |

Target genes and gene IDs (GenBank): GAPDH, glyceraldehyde 3-phosphate dehydrogenase, AF017079.1; β-Actin, DQ845171.1; CFTR, AY585334.1; NKCC, Na<sup>+</sup>/K<sup>+</sup>/2Cl<sup>-</sup> cotransporter, SLC12A2, BX674270.2.; K<sub>V</sub>LQT1 channel, DY409301.1.; KCa3.1 channel, EW513557.2.
